# Supplementary material
Source: PubMed Central journal article supplement (PMC4612426)
Supplement: NIHMS65529-supplement-1.pdf [file NIHMS65529-supplement-1.pdf]

## **Supplementary information**

### **A processed non-coding RNA regulates an altruistic bacterial antiviral system**

Tim R. Blower<sup>1</sup>, Xue Y. Pei<sup>1</sup>, Francesca L. Short<sup>1</sup>, Peter C. Fineran<sup>2</sup>, David P. Humphreys<sup>3</sup>, Ben F. Luisi<sup>1</sup> & George P. C. Salmond<sup>1</sup>

<sup>1</sup>*Department of Biochemistry, University of Cambridge, Cambridge, CB2 1QW, United Kingdom;* <sup>2</sup>*Department of Microbiology and Immunology, University of Otago, P.O. Box 56, Dunedin 9054, New Zealand;* <sup>3</sup>*UCB, 216 Bath Road, Slough, Berkshire, SL1 3WE, United Kingdom. Correspondence should be addressed to G.P.C.S. (gpcs@mole.bio.cam.ac.uk).*

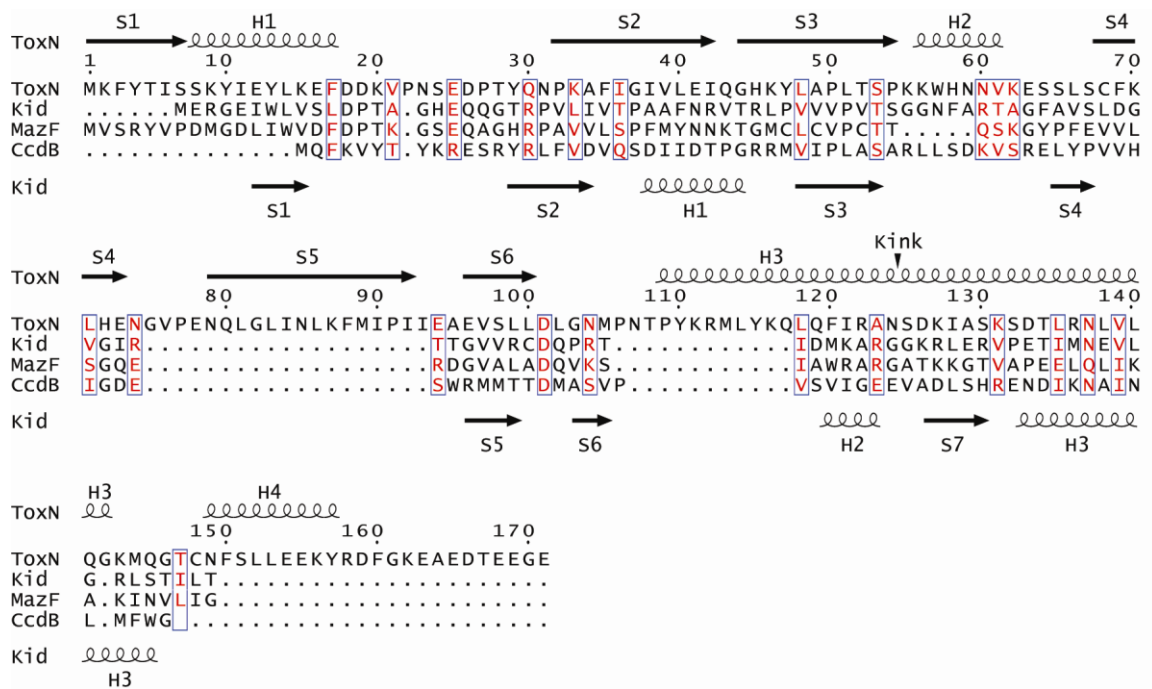

**Supplementary Figure 1** Amino acid sequence alignment of ToxN and structural homologues. The secondary structures of ToxN and Kid are drawn above and below the alignment, respectively, using loops to represent  $\alpha$ -helices and arrows to represent  $\beta$ -strands. The ToxN crystal structure resolved residues 1-162 and the secondary structure description only applies to these residues; the sequence for ToxN residues 163-171 is included for completeness. Protein sequences used are NCBI entries: ToxN, ACK87011; Kid, 1M1F\_B<sup>14</sup>; MazF, NP\_417262<sup>19</sup>; CcdB, NP\_061422<sup>30</sup>.

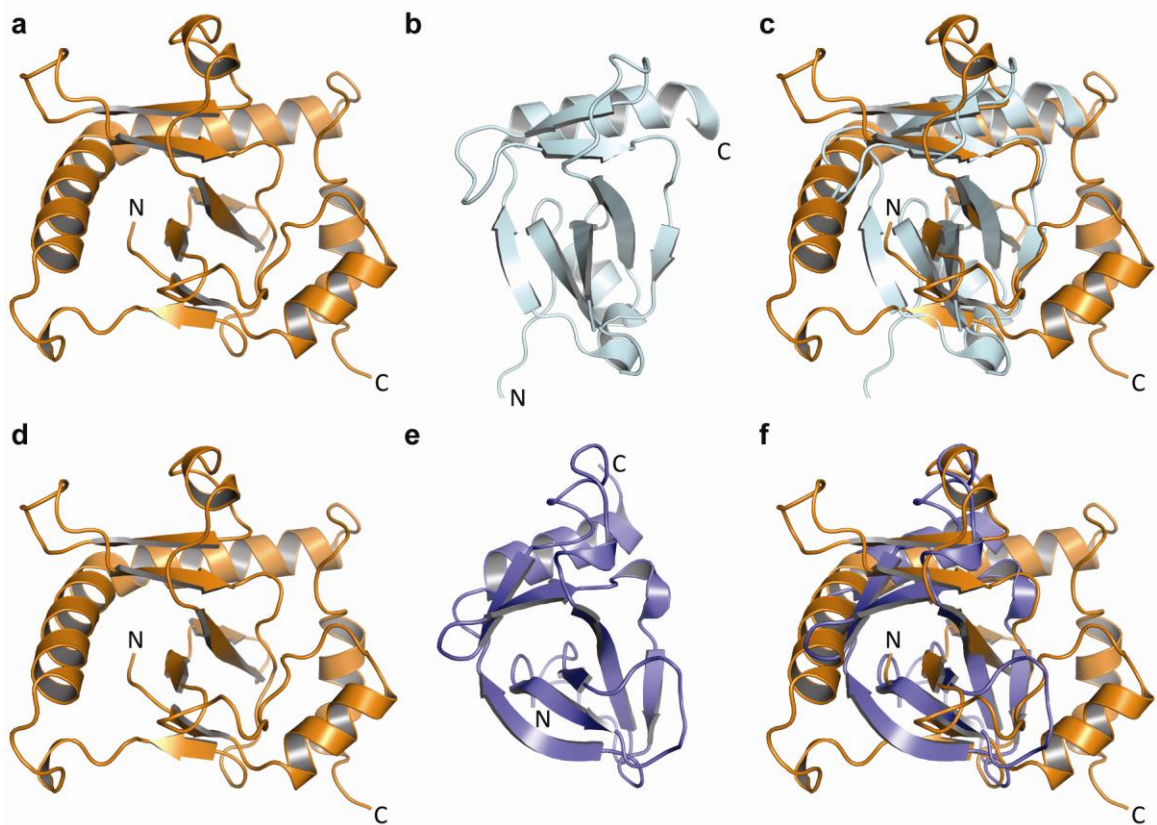

**Supplementary Figure 2** Further structural comparisons within the ToxN family **(a)** Cartoon representation of ToxN in orange. **(b)** Cartoon representation of MazF (PDB code: 1UB4<sup>19</sup>) in cyan. **(c)** Structural comparison between ToxN in orange and MazF in cyan. **(d)** as **(a)**. **(e)** Cartoon representation of CcdB (PDB code: 3HPW<sup>30</sup>) in blue. **(f)** Structural comparison between ToxN in orange and CcdB in blue. **(a)**-**(f)** are shown in the same orientation.

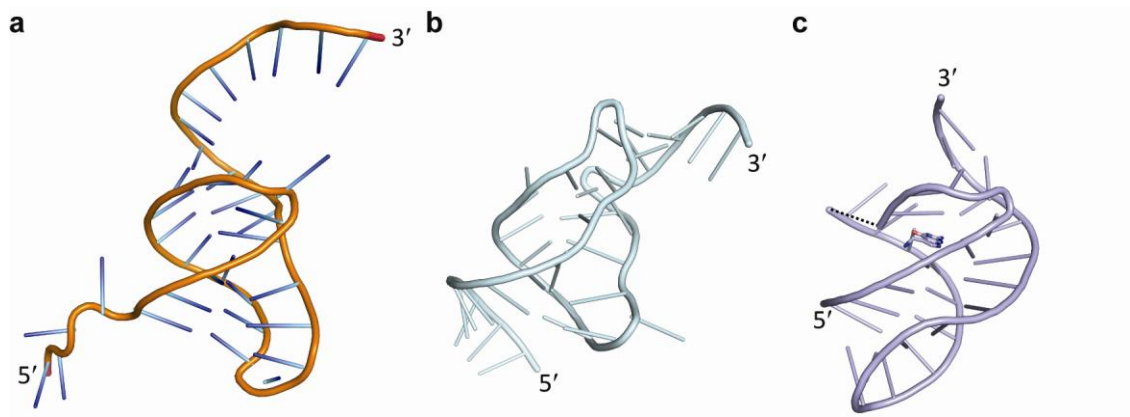

**Supplementary Figure 3** ToxI has a similar fold to two known pseudoknots. **(a)** Cartoon representation of ToxI in orange. **(b)** Cartoon representation of the vitamin B<sub>12</sub> RNA aptamer (PDB code 1ET4<sup>32</sup>) in pale cyan. **(c)** Cartoon representation of the preQ<sub>1</sub> riboswitch (PDB code 3FU2<sup>33</sup>) in purple. A grey dashed line indicates a join within the RNA strand between bases 12 and 14, as base 13 is missing from the PDB file. A preQ<sub>1</sub> molecule can be seen buried in a cleft of the pseudoknot. **(a)-(c)** are aligned in the same orientation, to allow comparison of the basic topologies.

**Supplementary Table 1. Buried surface area within ToxIN and R.M.S.D between protomers**

| Native 1, I4 <sub>1</sub> 32<br>(Å <sup>2</sup> ) |      |            | Native 2, P2 <sub>1</sub> 2 <sub>1</sub> 2 <sub>1</sub> |                         |                              |                         | Selenomethionine, C2         |       |                         |                              |                         |                              |
|---------------------------------------------------|------|------------|---------------------------------------------------------|-------------------------|------------------------------|-------------------------|------------------------------|-------|-------------------------|------------------------------|-------------------------|------------------------------|
| Protein                                           | RNA  | RNA        | Chain                                                   | Protein                 |                              | RNA                     |                              | Chain | Protein                 |                              | RNA                     |                              |
|                                                   | 1    | 2<br>(sym) |                                                         | (area, Å <sup>2</sup> ) | (R.M.S. D., Å <sup>2</sup> ) | (area, Å <sup>2</sup> ) | (R.M.S. D., Å <sup>2</sup> ) |       | (area, Å <sup>2</sup> ) | (R.M.S. D., Å <sup>2</sup> ) | (area, Å <sup>2</sup> ) | (R.M.S. D., Å <sup>2</sup> ) |
| 1990                                              | 1770 | 1632       | A                                                       | 2030                    | 0                            | 1362                    | 0                            | A     | 2022                    | 0                            | 1349                    | 0                            |
|                                                   |      |            | B                                                       | 1988                    | 0.04                         | 1381                    | 0.04                         | B     | 2031                    | 0.03                         | 1346                    | 0.03                         |
|                                                   |      |            | E                                                       | 2024                    | 0.04                         | 1319                    | 0.04                         | C     | 2011                    | 0.03                         | 1328                    | 0.03                         |
|                                                   |      |            | X                                                       | 2059                    | 0.03                         | 1501                    | 0.03                         |       |                         |                              |                         |                              |
|                                                   |      |            | Y                                                       | 1975                    | 0.04                         | 1386                    | 0.04                         |       |                         |                              |                         |                              |
|                                                   |      |            | V                                                       | 2092                    | 0.03                         | 1338                    | 0.03                         |       |                         |                              |                         |                              |
